# Supplementary material
Source: Research Square preprint supplement (doi:10.21203/rs.3.rs-9859908/v1)
Supplement: Supplementary file 1 [file 78630a6ffba2124387ebeb33.xlsx]

## Sheet: Supplemental Table 1
Supplemental Table 1. Epigenetic inhibitors used in this study.
Inhibitor	Domain	Common name	Action
ACAT1; ACAT2	KAT		Histone lysine acetyltransferase
Ara-C		Ara-C	Interferes with DNA replication
ATAD2A; ATAD2B	BROMO	GSK8814	Histone acetyl reader
BAZ2A; BAZ2B	BROMO	BAZ2-ICR	Histone acetyl reader
BET family-1	BROMO	(+)-JQ1	Histone acetyl reader
BET family-2	BROMO	I-BET151	Histone acetyl reader
BMI1-1	PHD		Polycomb repressive complex 1
BMI1-2	PHD		Polycomb repressive complex 1
BRD4	BROMO		Histone acetyl reader
BRD9	BROMO	dBRD9A (degrader)	Histone acetyl reader
BRD9; BRD7-1	BROMO	VZ185 (degrader)	Histone acetyl reader
BRD9; BRD7-2	BROMO	BI-9564	Histone acetyl reader
BRD9; BRD7-3	BROMO	dBRD9 (degrader)	Histone acetyl reader
BRPF1	BROMO	GSK6853	Histone acetyl reader
CARM1	PMT		Histone arginine methyltransferase
CBX1	CHROMO		Polycomb repressive complex 1
CBX4; CBX7	CHROMO	UNC3866	Polycomb repressive complex 1
CBX6	CHROMO		Polycomb repressive complex 1
CDK7	KINASE	THZ1	Promotes initiation of transcription
CDK9	KINASE		Promotes elongation of transcription
CREBBP, EP300	BROMO	GNE-049	Histone lysine acetyltransferase
CREBBP; EP300	KAT		Histone lysine acetyltransferase
DNMT1-1	DNMT	Decitabine	DNA methyltransferase
DNMT1-2	DNMT	RG-108	DNA methyltransferase
DOT1L	KMT	EPZ004777	Histone lysine methyltransferase
EED	WDR		Histone lysine methyl reader
EGLN1	PHD		Proline hydroxylase: regulation of HIF factors
EHMT2; EHMT1-1	KMT	DCG066	Histone lysine methyltransferase
EHMT2; EHMT1-2	KMT	BIX-01294	Histone lysine methyltransferase
EP300	KAT		Histone lysine acetyltransferase
EPAS1-1	HIF	PT2385	Encoding HIF2a
EPAS1-2	HIF	HIF-C2	Encoding HIF2a
ETV1	ETS	BRD32048	p300 dependent acetylation
EZH2	KMT	EPZ011989	Histone lysine methyltransferase
HDAC-1	HDAC	vorinostat	Histone deacetylase
HDAC-2	HDAC	dacinostat	Histone deacetylase
HDM201		HDM201	p53-MDM2 inhibitor
HIF1A	HIF	BAY 87-2243	HIF1A
KAT2A; EP300	KAT	L-002	Histone lysine acetyltransferase
KAT2B	BROMO	L-Moses	Histone lysine acetyltransferase
KAT5	KAT	TH1834	Histone lysine acetyltransferase
KAT6A	KAT		Histone lysine acetyltransferase
KDM1A	KDM	ORY-1001	Histone lysine demethylase
KDM4C	KDM	SD70	Histone lysine demethylase
KDM4E	KDM		Histone lysine demethylase
KDM5A	KDM	KDM5-IN-1	Histone lysine demethylase
KDM5A; KDM5B; KDM5C	KDM	KDM5-C70 (pro-drug)	Histone lysine demethylase
KDM6A	KDM	GSK-J4 (pro-drug)	Histone lysine demethylase
KMT5B; KMT5C	KMT		Histone lysine methyltransferase
L3MBTL3	MBT		Methyl lysine reader
MEN1	OTHER		Histone lysine methyltransferase
MLLT1, MLLT3	YEATS		Histone lysine methyltransferase
NAT10	KAT	Remodelin	Histone lysine acetyltransferase
Pan DNMT	DNMT	5-azacytidine	DNA methyltransferase
PARP1	PARP		Chromatin relaxation after damage
PARP1; PARP2	PARP	veliparib	Chromatin relaxation after damage
PRDM9-1	KMT		Histone lysine methyltransferase
PRDM9-2	KMT	MRK-740	Histone lysine methyltransferase
PRMT1	PMT		Histone arginine methyltransferase
PRMT3	PMT		Histone arginine methyltransferase
PRMT4	PMT	SKI-73 (pro-drug)	Histone arginine methyltransferase
PRMT5	PMT		Histone arginine methyltransferase
PRMT6-1	PMT	SGC6870	Histone arginine methyltransferase
PRMT6-2	PMT		Histone arginine methyltransferase
PRMT7	PMT	(pro-drug)	Histone arginine methyltransferase
SETD7	KMT		Histone lysine methyltransferase
SIRT1	HDAC	selisistat	Histone deacetylase
SIRT2	HDAC	AGK2	Histone deacetylase
SMYD2	KMT		Histone lysine methyltransferase
SMYD3	KMT		Histone lysine methyltransferase
SPI1	ETS	DB2313	Histone lysine methyltransferase
SPIN1	TUDOR	Vinspinin	Histone code reader
Venetoclax		Venetoclax	BCL2 inhibitor

## Sheet: Supplemental Table 2
Supplemental Table 2. Metabolic inhibitors used in this study.
Inhibitor	Target	Pathway	Class	Conc 1	Conc 2
2DG	Hexokinases, glucose import	Glycolysis	Glycolysis	1 mM	3 mM
3-Bromopyruvic Acid	Hexokinase II	Glycolysis	Glycolysis	0.2 nM	1 nM
3-Deazaadenosine	AHCY/SAHH	Methionine metabolism/Methytransferase activity	Methionine metabolism	0.5 uM	2 uM
3K	PKM2, inhibitor	Glycolysis	Glycolysis	0.5 uM	2 uM
3-Nitroproprionic Acid	Complex II	OxPHOS	OxPHOS	0.5 mM	5 mM
6MP	Purine antagonist	Nucleic acid metabolism	Nucleic acid metabolism	0.5 uM	2 uM
Ac-CoA SI	ACSS2	Fatty acid synthesis	Lipid metabolism	2.5 uM	10 uM
AG-270	MAT2a	Methionine metabolism	Methionine metabolism	5 uM	50 uM
Alovudine	POLG inhibitor	mtDNA depletion	mtDNA depletion	0.5 uM	2 uM
AraC	DNA	DNA synthesis	DNA synthesis	0.1 uM	1 uM
Auranofin	Thioredoxin reductase	Ferroptosis	Ferroptosis	0.1 uM	0.4 uM
AZD3965	MCT1	Lactate Import, glycolysis	Lactate metabolism	25 nM	200 nM
BMS-309403	Fatty acid binding protein 4, adipocyte (FABP4)	Lipid metabolism	Lipid metabolism	25 uM	100 uM
Brequinar	DHODH	Pyrimidine Biosynthesis	Nucleic acid metabolism	0.25 uM	1 uM
BSO	Gamma-glutamylcysteine synthetase	Cysteine/gluthathionine metabolism	ROS metabolism	25 uM	100 uM
CB-839	Glutaminase (KGA and GAC)	Glutaminolysis	Glutaminolysis	0.5 uM	5 uM
DAP	PDK1	Glycolysis	Glycolysis	5 uM	20 uM
DASA-58	PKM2, activators	Glycolysis	Glycolysis	25 uM	100 uM
Dipyridamole	SREBP	Sterol biosynthesis	Lipid metabolism	5 uM	20 uM
Enasidenib	IDH2	2-HG production, TCA cycle	Targeted therapy	5 nM	20 nM
Eprenetapopt	Thioredoxin reductase 1	Ferroptosis	Ferroptosis	10 uM	50 uM
Etomoxir	Carnitine palmitoyltransferase-1	Fatty Acid Oxidation	Lipid metabolism	3 uM	50 uM
Fatostatin	SREBP	Sterol biosynthesis	Lipid metabolism	5 uM	50 uM
GW501516	PPARδ antagonist	PPAR-FAO pathway	Lipid metabolism	25 uM	75 uM
IACS-010759	Complex I	OxPHOS	OxPHOS	100 nM	400 nM
Ivosidenib	IDH1	2-HG production, TCA cycle	Targeted therapy	5 nM	20 nM
KPT9274	NAMPT	NAD biosynthesis	NAD biosynthesis	0.5 uM	3 uM
Metformin	TCA, AMPK complex I	Gluconeogenesis	OxPHOS	2.5 mM	10 mM
Midostaurin	Multi-targeted protein kinase inhibitor		Multi-targeted protein kinase inhibitor	10 nM	50 nM
Mubritinib	ERBB2, complex I	OxPHOS	OxPHOS	100 nM	500 nM
OT-82	NAMPT	NAD biosynthesis	NAD biosynthesis	2.5 nM	10 nM
Rotenone	Complex I	OxPHOS	OxPHOS	50 nM	200 nM
SHIN1	SHMT1/2	Amino acid biosynthesis	Amino acid biosynthesis	1 uM	25 uM
SHMT-IN-2	SHMT1/2	Amino acid biosynthesis	Amino acid biosynthesis	5 uM	25 uM
SSI-4	SCD1	MUFA formation	Lipid metabolism	1 uM	10 uM
SSO	CD36	Fatty Acid Oxidation	Lipid metabolism	100 uM	400 uM
ST1326	Carnitine palmitoyl transferase 1a (CPT1a)	Fatty Acid Oxidation	Lipid metabolism	10 uM	50 uM
Syrosingopine	MCT4	Lactate Export, glycolysis	Lactate metabolism	5 uM	50 uM
Triacsin C	ACSL	Lipid metabolism	Lipid metabolism	2.5 uM	10 uM
TTFA	Complex II	OxPHOS	OxPHOS	50 uM	200 uM
UPGL00004	Glutaminase C	Glutaminolysis	Glutaminolysis	0.25 uM	1 uM
Venetoclax	BCL2	Apoptosis Modulation and Signaling	Apoptosis	0.1 uM	1 uM
